# Supplementary material for: “There’s Something There in That Hyphen”: The Lived Experiences of Asian and Asian American Higher Education Students in the Southwest Borderlands of the United States
Source: MDPI journal article supplement (doi:10.3390/genealogy7010022), 2023-03-16
Supplement: s1 [file s1]

## INVITATION TO PARTICIPATE: EMAIL COMMUNICATION

Undergraduate and Graduate Students Needed for Study on Asian American Experiences in Hispanic-Serving Institutions

- Are you currently enrolled at \_\_\_\_\_?
- Have you been at the university for at least one semester?
- Do you identify as Asian?
- Are you 18 years or older?

If so, I invite you to participate in my study exploring the experiences of Asian American students at \_\_\_\_\_. I am interested in learning how your experiences may or may not have impacted your racial identity. You will be asked to participate in an interview lasting approximately 45-60 minutes. Your participating is completely voluntary and you may withdraw from the study at any time without penalty. If interested, please contact me or follow the link below to complete the Informed Consent and Demographic Information. I look forward to hearing from you!

Chadrhyn Pedraza – Doctoral Student in College of Education, Educational Leadership and Administration Department, Southwest State University.

Email: \_\_\_\_\_

Link to Informed Consent and Demographic Information



# STUDENTS NEEDED

## DISSERTATION STUDY

EXPLORING:

**Asian American  
student experiences  
while attending a  
Hispanic-Serving  
Institution**

Contact: Chadrhyn Pedraza

Email: [chadrhyn@\[REDACTED\]](mailto:chadrhyn@[REDACTED])

Or use the link below to access the informed Consent

[HTTPS://GOO.GL/FORMS/\[REDACTED\]](https://goo.gl/forms/[REDACTED])

### PARTICIPATION REQUIREMENTS

- IDENTIFY AS ASIAN AMERICAN
- ATTENDED AT LEAST ONE ON-CAMPUS COURSE
- BE 18 YEARS OR OLDER
- ATTENDED [REDACTED] FOR AT LEAST ONE SEMESTER
- ENROLLED AS STUDENT (UNDERGRADUATE OR GRADUATE )
